# Supplementary material for: The effect of human resource management on performance in hospitals in Sub-Saharan Africa: a systematic literature review
Source: Hum Resour Health. 2018 Aug 2;16:34. doi: 10.1186/s12960-018-0298-4 (PMC6090989; doi:10.1186/s12960-018-0298-4)
Supplement: Supplementary file 2 — Number of studies that link a specific HRM practice to a specific outcome. (XLSX 11 kb) [file 12960_2018_298_MOESM2_ESM.xlsx]

## Sheet: Additional file 2
Additional file 2 Number of studies that link a specific HRM practice to a specific outcome
	(1) Individual employee outcomes						(2) Team outcome	(3) Organizational outcomes				(4) Patient outcomes
18 HRM practices identified	improved performance	job satisfaction	intention to leave	motivataion	workload reduction	reduced moonlighting	team performance	quality of care	reduced waiting time	reduced staff shortage	patient safety	clinical outcome	patient experience
1. training and education	15	17	17	5	1	1	1	15	5		2	6	2
2. salary/ compensation	12	15	19	7				4
3. performance appraisal	2	3	1	3				3
4. communication/ feedback	4	2	2	3							1	1	2
5. recognition or promotion	4	3	3	3				2	2
6. supplementary financial allowances	9	7	10	5		1		3	3			1
7. teamwork	5	5	3	1			1	3			1	2	2
8. staffing/selection and recruitment	5	2	5	1				3	3		1		2
9. scheduing and rostering	6	13	14	4				6	1				1
10. written job descriptions	1	1						1
11. task shifting		1	1					3	1	4		2	1
12. job autonomy		2
13. job security and safety				2
14. supportive supervision	2	4	5	3				3			1
15. mentorship	1	1	2					1	1
16. management/leadership	7	7	7						2	1		1	2
17. work life balance	1		1
18. employee engagement	2
Note that the number of studies exceeds the total of 111 studies as a study often researched multiple HRM interventions
